# Supplementary material
Source: publisher site journal article supplement (https://www.dovepress.com/article/448565)
Supplement: Supplementary file 1 [file get_supplementary_file.php]

**SUPPLEMENTARY TABLES**

**Supplementary Table 1.** Characteristics of convincing allergy, probable allergy and self-report allergy between

| **N = 285** | **Among respondents**  **(N=1038)** | **Among reported SFA**  **(N=285)** |
| --- | --- | --- |
| **Any** | 285 (27.46%) | 285 (100%) |
| Convincing allergy | 209 (20.13%) | 209 (73.33%) |
| Probable allergy | 23 (2.22%) | 23 (8.07%) |
| Self-reported allergy | 53 (5.11%) | 53 (18.6%) |
| **Shellfish allergy** | 265 (25.53%) | 265 (92.98%) |
| Convincing allergy | 197 (18.98%) | 197 (69.12%) |
| Probable allergy | 22 (2.12%) | 22 (7.72%) |
| Self-reported allergy | 46 (4.43%) | 46 (16.14%) |
| **Fish allergy** | 51 (4.91%) | 51 (17.89%) |
| Convincing allergy | 37 (3.56%) | 37 (12.98%) |
| Probable allergy | 3 (0.29%) | 3 (1.05%) |
| Self-reported allergy | 11 (1.06%) | 11 (3.86%) |
| **Shellfish & fish** | 31 (2.99%) | 31 (10.88%) |
| Convincing allergy | 25 (2.41%) | 25 (8.77%) |
| Probable allergy | 2 (0.19%) | 2 (0.7%) |
| Self-reported allergy | 4 (0.39%) | 4 (1.4%) |

**Supplementary Table 2**. Profile of shellfish and fish among the convincing allergy group

1. Shellfish allergy

| **Shellfish** | | N = 197 |
| --- | --- | --- |
| **Crustaceans** | Tiger prawn | 115 (58.38%) |
| Seawater crab | 113 (57.36%) |
| Sentinnel crab | 82 (41.62%) |
| Freshwater crab | 69 (35.03%) |
| Tiny shrimp | 60 (30.46%) |
| Lobster | 3 (1.52%) |
| |  | 9 (4.57%) | | --- | --- | |  | 12 (6.09%) |   **Mollusk** | Squid | 32 (16.24%) |
| Clam | 18 (9.14%) |
| Oyster | 18 (9.14%) |
| Snail | 15 (7.61%) |
| **Others** |  | 6 (3.47%) |
| **Unknown** |  | 5.74%) |

1. Fish allergy

| **Fish** | N = 37 |
| --- | --- |
| Tuna | 21 (56.76%) |
| Mackerel | 10 (27.03%) |
| Pompano | 7 (18.92%) |
| Red tilapia | 2 (5.41%) |
| Salmon | 1 (2.70%) |
| Snakehead | 1 (2.70%) |
| Capelin | 0 |
| Ray | 0 |
| Others | 2 (5.41%) |
| Unknown | 1 (2.70%) |

**SUPPLEMENTARY FIGURE**

**
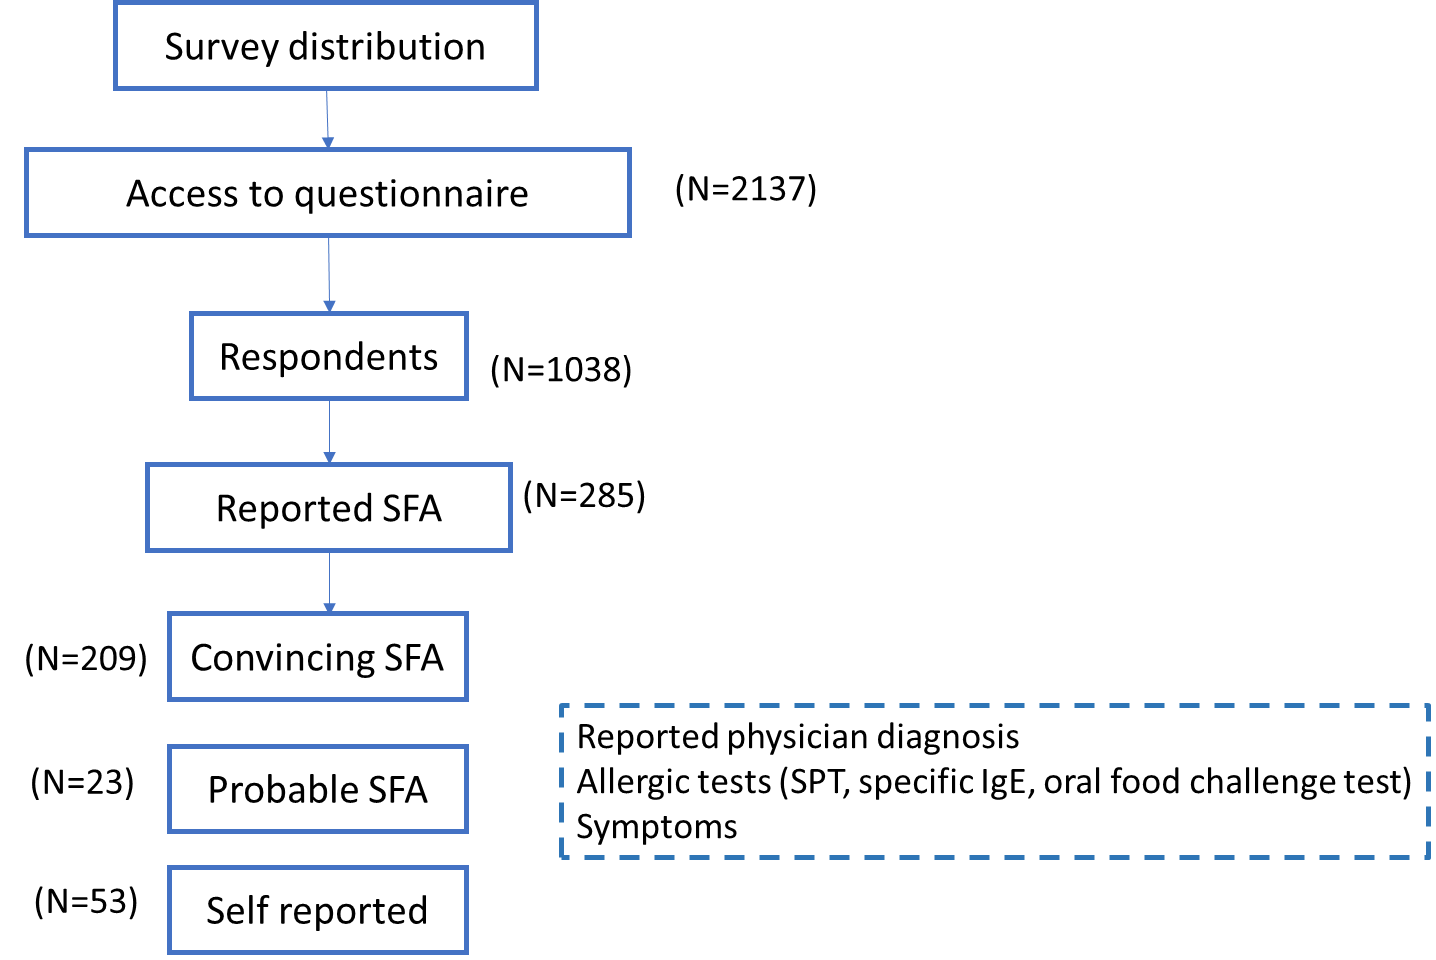
**

**Supplementary Figure 1.** Flowchart showing the data collection and selection of participants with SFA. *SFA, seafood allergy*
